# Supplementary material for: Landlockedness, Corruption, and Economic Growth in BIMSTEC
Source: Research Square preprint supplement (doi:10.21203/rs.3.rs-162168/v1), 2021-02-11
Supplement: Supplementary file 1 [file 291d4efca93844bbfa4072ff.xlsx]

## Sheet: Sheet1
Country	FY	CPI	GROWTH	INF	CPI2	Rem/GDP	D1	LF	GFCF/GDP
Nepal	2012	27	4.78119	9.45981	729	25.4224	1	14514130	20.7671
	2013	31	4.12888	9.04016	961	28.9744	1	14700364	22.5941
	2014	29	5.98898	8.36415	841	29.4389	1	14902007	23.5176
	2015	27	3.32291	7.86891	729	31.4324	1	15142534	27.9709
	2016	29	0.588678	8.79034	841	31.2086	1	15473806	28.7282
	2017	31	7.90574	3.6271	961	27.5138	1	15850639	31.8131
	2018	31	6.28976	4.2	961	28.5597	1	16272759	34.1059
Bangaladesh	2012	26	6.52144	6.2175	676	10.5879	0	58959056	28.2623
	2013	27	6.01361	7.53041	729	9.24522	0	60053264	28.3896
	2014	25	6.06106	6.99164	625	8.66905	0	61162861	28.5779
	2015	25	6.55265	6.19428	625	7.8407	0	62283352	28.8867
	2016	26	7.11349	5.51353	676	6.13069	0	63385490	29.6526
	2017	28	7.28418	5.70207	784	5.40674	0	67144424	30.5105
	2018	26	7.86371	5.54362	676	5.67918	0	68371792	31.2349
Bhutan	2012	63	5.07171	10.9197	3969	1.01863	1	325414	67.9844
	2013	63	2.1425	7.00667	3969	0.672143	1	335294	46.4367
	2014	65	5.74546	8.27106	4225	0.749432	1	333521	53.0468
	2015	65	6.64456	4.54814	4225	0.98106	1	351885	54.2117
	2016	65	8.0221	4.31017	4225	1.59073	1	359077	54.8531
	2017	67	4.6291	3.85825	4489	1.76112	1	365783	51.365
	2018	68	2.29065	2.72378	4624	2.37663	1	372750
Sri Lanka	2012	40	9.14457	7.54291	1600	8.76686	0	8172455	29.0074
	2013	37	3.39573	6.90845	1369	8.64152	0	8498965	29.2927
	2014	38	4.9607	3.179	1444	8.86674	0	8452073	27.7419
	2015	37	5.00768	3.76837	1369	8.68409	0	8466471	25.6998
	2016	36	4.48663	3.95889	1296	8.81282	0	8520776	26.7592
	2017	38	3.41982	7.70414	1444	8.16896	0	8586360	26.4805
	2018	38	3.20913	2.13504	1444	7.92236	0	8675704	25.6546
Myanmar	2012	15	7.33267	1.46758	225	0.458168	0	24324492	28.8415
	2013	21	8.426	5.48339	441	2.72754	0	24519081	31.0755
	2014	21	7.99092	5.04641	441	2.84804	0	24724182	31.2948
	2015	22	6.99284	9.48547	484	3.35854	0	24942807	34.3661
	2016	28	5.86247	6.96474	784	3.7094	0	24636187	31.8935
	2017	30	6.75863	4.57273	900	3.86413	0	24325830	31.4536
	2018	29	6.20005	6.87283	841	3.98858	0	24561204
Thailand	2012	37	7.24279	3.0149	1369	1.42288	0	40095155	26.9937
	2013	35	2.68738	2.18489	1225	1.56658	0	39221248	25.3835
	2014	38	0.984414	1.89514	1444	1.60164	0	38987294	24.6614
	2015	38	3.1339	-0.900425	1444	1.46891	0	38920834	24.5285
	2016	35	3.35649	0.18815	1225	1.52055	0	38677972	23.7562
	2017	37	4.02409	0.665632	1369	1.47605	0	38793465	23.1743
	2018	36	4.12923	1.0639	1296	1.47791	0	38903300	22.8406
India	2012	36	5.45639	9.31245	1296	3.76554	0	462667271	33.4369
	2013	36	6.38611	10.9076	1296	3.76849	0	471350473	31.2958
	2014	38	7.41023	6.35319	1444	3.4519	0	479842798	30.0802
	2015	38	7.99625	5.87243	1444	3.27582	0	487984386	28.7331
	2016	40	8.16953	4.94103	1600	2.73941	0	495834167	28.2184
	2017	40	7.16789	2.49089	1600	2.60033	0	503170333	28.6447
	2018	41	6.98233	4.8607	1681	2.89805	0	509945440	28.8743
